# Supplementary material for: Electrospun natural product-based Shidu Formula for the management of psoriasis
Source: Royal Society of Chemistry journal article supplement (doi:10.1039/d5nr01873k), 2025-01-01
Supplement: d5nr01873k1.pdf [file d5nr01873k1.pdf]

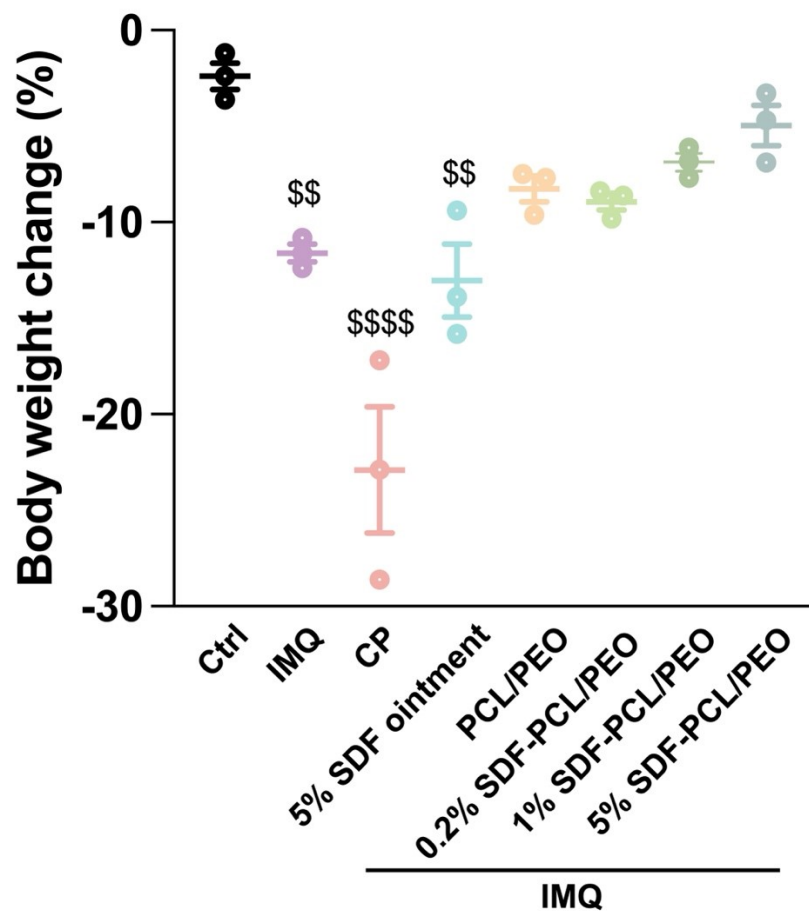

**Figure S1. Changes in body weight of experimental mice at the end of experimental periods (n=3).** \$\$ $p < 0.01$  and \$\$\$ $p < 0.001$  compared to control (Ctrl).

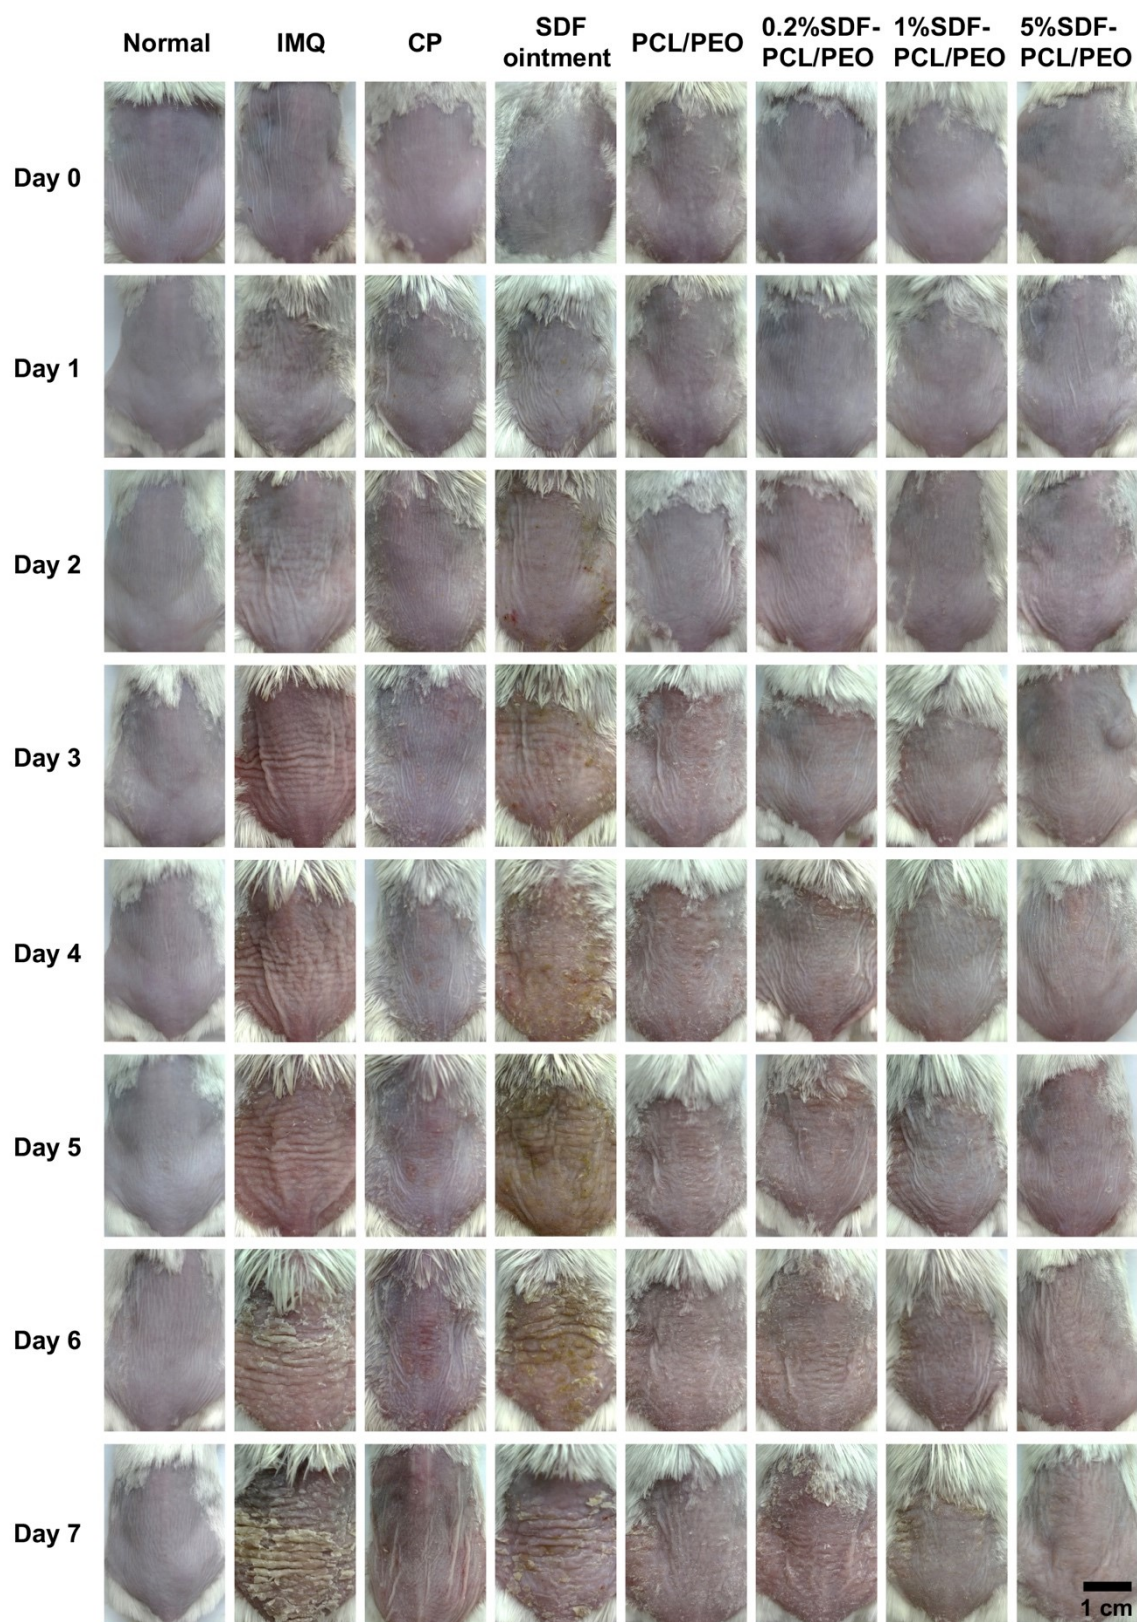

**Figure S2. The macroscopic appearance of dorsal shaved skin of mice treated with indicated formulations from day 1 to day 7. Scale bar: 1 cm.**



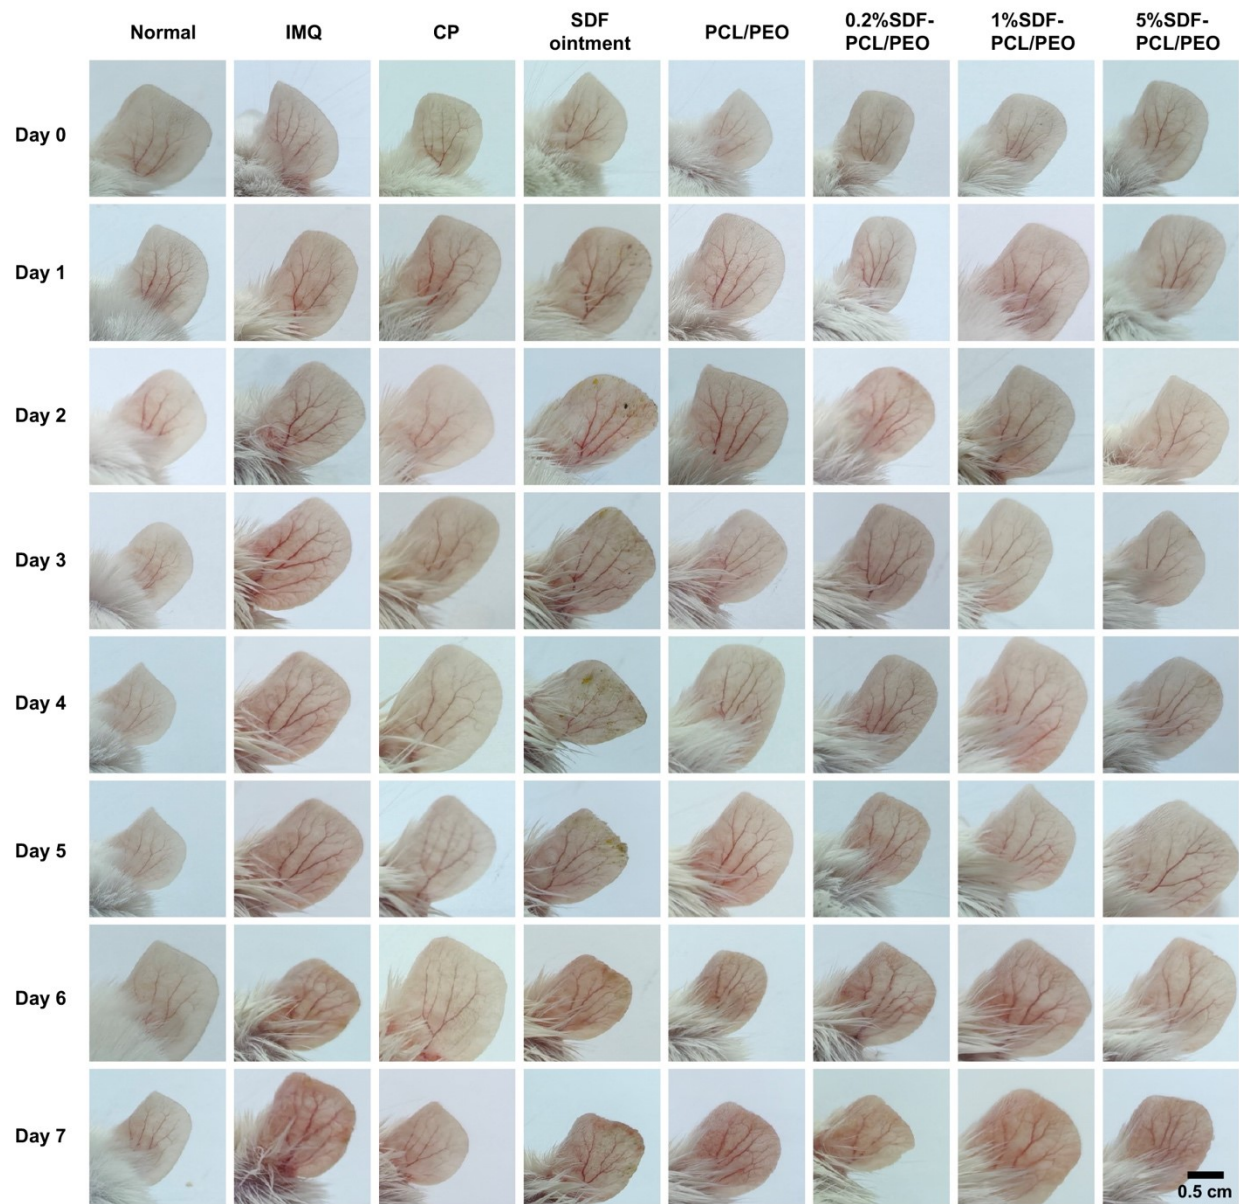

**Figure S3.** The macroscopic appearance of the right ear of mice treated with the indicated formulations from day 1 to day 7. Scale bar: 0.5 cm.

**Table S1. The wavenumber of characteristic peaks for different samples**

| Samples            | Wavenumber (cm <sup>-1</sup> ) | Functional group |
|--------------------|--------------------------------|------------------|
| Indirubin          | 1360                           | C-H              |
| Gallic acid        | 1541                           | C=C              |
|                    | 850                            | Ar-C             |
| Berberine chloride | 1635                           | C=N <sup>+</sup> |
| PCL/PEO            | 2940, 2863                     | O-H              |
|                    | 1726                           | C=O              |
|                    | 1103                           | C-O-C            |
| SDF-PCL/PEO        | 2940, 2863                     | O-H              |
|                    | 1726                           | C=O              |
|                    | 1103                           | C-O-C            |
|                    | 1635                           | C=N <sup>+</sup> |
|                    | 1541                           | C=C              |
|                    | 872                            | Ar-C             |
|                    | 1360                           | C-H              |
